# Supplementary material for: Extensive protein expression changes induced by pamidronate in RAW 264.7 cells as determined by IP-HPLC
Source: PeerJ. 2020 May 21;8:e9202. doi: 10.7717/peerj.9202 (PMC7246033; doi:10.7717/peerj.9202)
Supplement: Supplemental Information 1 — From this algorithm, the relative ratio (%) between objective protein level and control protein level can be obtained, albeit it is impossible to get the concentration of objective protein through IP-HPLC. [file peerj-08-9202-s001.docx]

**Supplementary data 1**

**Mathematical algorithm for IP-HPLC analysis**

- IP-HPLC peak area (mAU*s) contains antigen peak ({Ag}), antibody peak ({Ab}), and antigen-antibody complex peak ({Ag-Ab}).

A (mAU*s) = {Ag1} + {Ab1} + {Ag2-Ab2}

- UV spectrum shows relatively proportional value (α) between ({Ag} + {Ab}) and {Ag-Ab}; {Ag-Ab} = α({Ag} + {Ab})

A (mAU*s) = {Ag1} + {Ab1} + α({Ag2} + {Ab2})

A (mAU*s) = ({Ag1} + α({Ag2}) +({Ab1} + α{Ab2})

{Ag1} + α({Ag2} (mAU*s) = A - ({Ab1} + α{Ab2})

- When the antibody was monospecific or monoclonal to antigen, Ag1/Ag2 = Ab1/Ab2 = β.

{Ag1} + ({Ag2} (mAU*s) = A - ({Ab1} + α{Ab2})

{Ag1} (1 + ) (mAU*s) = A - ({Ab1} + α{Ab2})

{Ag1} (mAU*s) =

And

{Ag1} + α({Ag2} (mAU*s) = A - ({Ab1} + α{Ab2})

β({Ag2} + α({Ag2} (mAU*s) = A - ({Ab1} + α{Ab2})

β({Ag2} + α({Ag2} (mAU*s) = A - ({Ab1} + α{Ab2})

{Ag2}(α + β) (mAU*s) = A - ({Ab1} + α{Ab2})

{Ag2}(α + β) (mAU*s) =

- And then, the objective antigen expression was {Ag1} + {Ag2}.

{Ag1} + {Ag2} (mAU*s) =

- {Ag1c} + {Ag2c} (mAU*s) is an objective antigen expression of control group, while {Ag1e} + {Ag2e} (mAU*s) is an objective antigen expression of experimental group.

- The ratio compared between experiment and control objective antigen expression is ({Ag1e} + {Ag2e})/({Ag1c} + {Ag2c}).

=

=

- and are replaceable with γAave (Aave is average of Ac and Ae).

- Therefore,

=

- Because ({Ag1e} + {Ag2e}) and ({Ag1c} + {Ag2c}) are mathematically hypothetical value (mAU*s), their square root value may approximate the comparable expression level (mAU).

=

= x 100 (%)

- γ can be determined by experimental IP-HPLC. If 15%-reduced amount of objective protein sample was applied to Protein A/G bead column compared to control group. The IP-HPLC results were as follow;


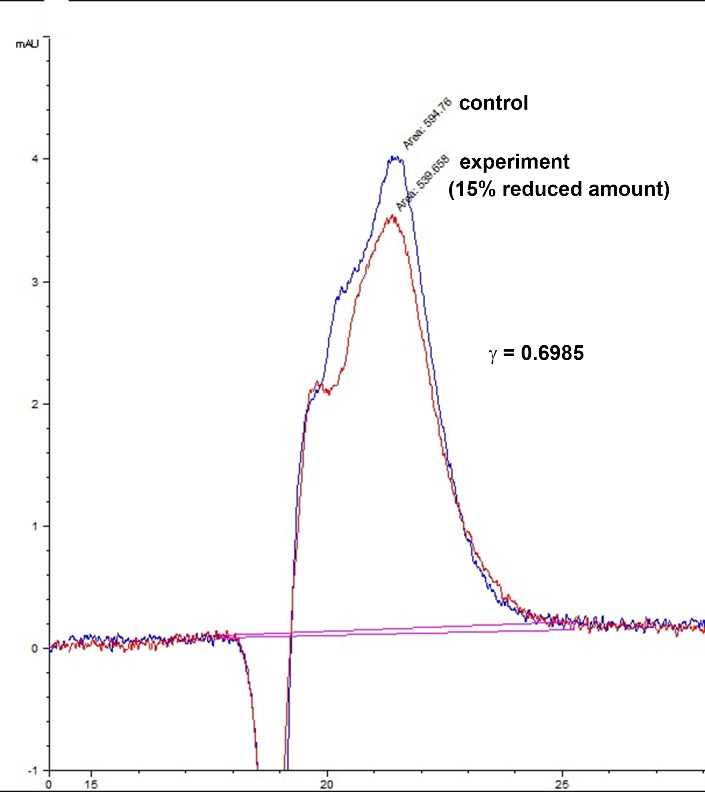


When the eluted proteins containing antibody were analyzed with 30 cm long column at low running speed (0.3 mL/min), the proteins were slightly separated but still appeared much overlapped in chromatography.

- And then,

= x 100 = 85 (%)

x 100 = 85 (%)

x 100 = 85 (%)

Therefore, constant γ can be calculated as 0.6985, and used to subtract other elements besides objective protein.

From this algorithm, the relative ratio (%) between objective protein level and control protein level can be obtained, albeit it is impossible to get the concentration of objective protein through IP-HPLC.
